# Supplementary material for: A Study on the Use of the Phyto-Courier Technology in Tobacco Leaves Infected by Agrobacterium tumefaciens
Source: MDPI journal article supplement (doi:10.3390/ijms241814153), 2023-09-15
Supplement: s1 [file s1]

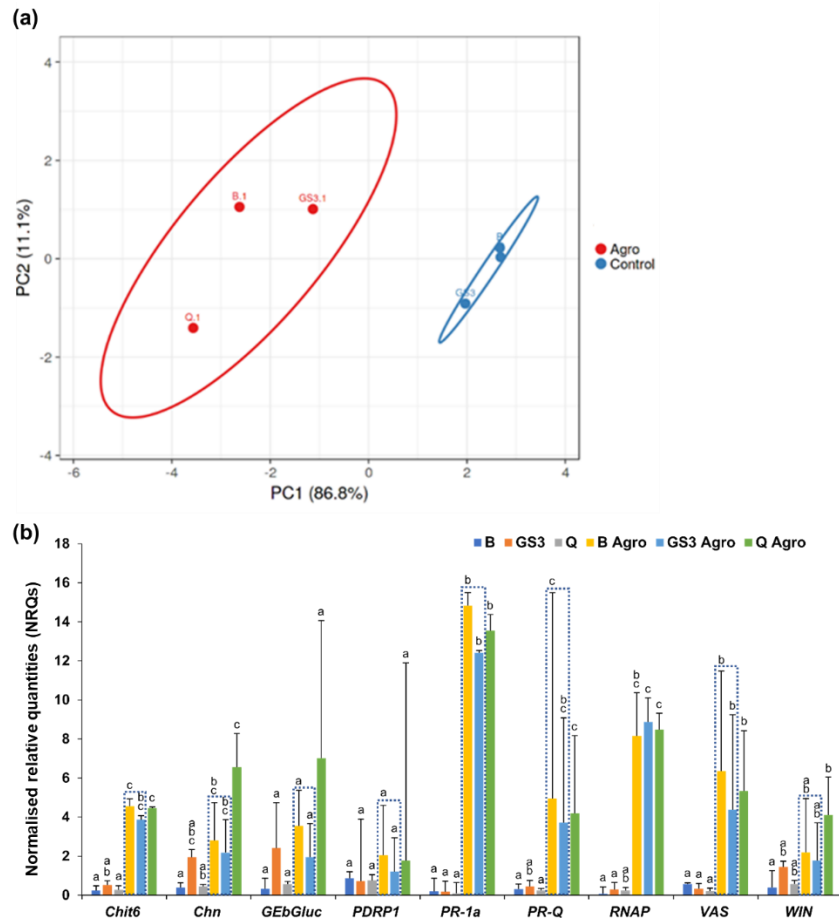

**Figure S1.** (a) PCA of the gene expression values (red ellipse: stressed leaves, blue ellipse: control leaves); (b) Gene expression data expressed as normalized relative quantities (NRQs). The error bars refer to the standard deviation calculated from four biological replicates. Different letters indicate statistically significant differences among groups ( $p$ -value  $< 0.05$ ). An ANOVA one-way analysis followed by Tukey's test was applied for *GEbGluc* [ $F(5) = 2.802$ ,  $p$ -value = 0.048] *PDRP1* [ $F(5) = 3.248$ ,  $p$ -value = 0.29], *WIN* [ $F(5) = 3.654$ ,  $p$ -value = 0.019], whereas a Kruskal-Wallis test with Dunn's post-hoc test was applied for *Chit6* [ $X^2(5) = 17.92$ ,  $p$ -value = 0.003], *Chn* [ $X^2(5) = 11.29$ ,  $p$ -value = 0.46], *PR-1a* [ $X^2(5) = 17.63$ ,  $p$ -value = 0.003], *PR-Q* [ $X^2(5) = 17.77$ ,  $p$ -value = 0.003], *RNAP* [ $X^2(5) = 18.47$ ,  $p$ -value = 0.002], *VAS* [ $X^2(5) = 17.74$ ,  $p$ -value = 0.003]. The dotted areas show the trend towards decreased expression values in the GS3-treated leaves as compared to B-treated samples. B: buffer; GS3: phyto-courier formulation containing 25 mg quercetin; Q: quercetin; Agro: agroinfiltrated.

**Table S1.** Statistical parameters of the data shown in Figure 1.

| <b>Statistical parameters of Figure 1a</b>                     | <b>Statistical parameters of Figure 1b</b>                |
|----------------------------------------------------------------|-----------------------------------------------------------|
| <i>OEE1</i> [F(2,6) = 1.029, <i>p</i> -value = 0.413]          | <i>OEE1</i> [F(2,6) = 0.330, <i>p</i> -value = 0.731]     |
| <i>PSI-N</i> [F(2,6)= 18.033, <i>p</i> -value = 0.003]         | <i>PSI-N</i> [F(2,6)= 0.969, <i>p</i> -value = 0.432]     |
| <i>RuBisCO-BP</i> [ $X^2(2)$ = 4.622, <i>p</i> -value = 0.099] | <i>RuBisCO-BP</i> [F(2,6)=2.103, <i>p</i> -value = 0.203] |
| <i>SerThrKin</i> [F(2,6)= 0.161, <i>p</i> -value = 0.855]      | <i>SerThrKin</i> [F(2,6)= 6.679, <i>p</i> -value = 0.030] |
| <i>Chit6</i> [F(2,6) = 5.001, <i>p</i> -value = 0.053]         | <i>Chit6</i> [F(2,6) = 0.106, <i>p</i> -value = 0.856]    |
| <i>Chn</i> [F(2,6) = 4.374, <i>p</i> -value = 0.067]           | <i>Chn</i> [ $X^2(2)$ = 1.156, <i>p</i> -value = 0.561]   |
| <i>GEbGluc</i> [F(2,6) = 5.270, <i>p</i> -value = 0.048]       | <i>GEbGluc</i> [F(2,6) = 2.051, <i>p</i> -value = 0.210]  |
| <i>PDRPI</i> [F(2,6) = 1.694, <i>p</i> -value = 0.261]         | <i>PDRPI</i> [F(2,6) = 1.021, <i>p</i> -value = 0.451]    |
| <i>PO</i> [F(2,6) = 1.623, <i>p</i> -value = 0.273]            | <i>PO</i> [F(2,6) = 18.658, <i>p</i> -value = 0.003]      |
| <i>PR-1a</i> [F(2,6) = 1.576, <i>p</i> -value = 0.282]         | <i>PR-1a</i> [F(2,6) = 6.573, <i>p</i> -value = 0.031]    |
| <i>PR-Q</i> [F(2,6) = 11.781, <i>p</i> -value = 0.008]         | <i>PR-Q</i> [ $X^2(2)$ = 0.089, <i>p</i> -value = 0.957]  |
| <i>RNAP</i> [F(2,6) = 1.955, <i>p</i> -value = 0.222]          | <i>RNAP</i> [F(2,6) = 19.653, <i>p</i> -value = 0.002]    |
| <i>VAS</i> [F(2,6) = 7.394, <i>p</i> -value = 0.024]           | <i>VAS</i> [F(2,6) = 0.974, <i>p</i> -value = 0.430]      |
| <i>WIN2</i> [F(2,6) = 0.224, <i>p</i> -value = 0.806]          | <i>WIN2</i> [F(2,6) = 1.787, <i>p</i> -value = 0.246]     |
